# Supplementary material
Source: PubMed Central journal article supplement (PMC4048256)
Supplement: ehp.1306693.s001.pdf [file ehp.1306693.s001.pdf]

## **Supplemental Material**

### **Survey of County-Level Heat Preparedness and Response to the 2011 Summer Heat in 30 U.S. States**

Jalonne L. White-Newsome, Brenda Ekwurzel, Mia Baer-Schultz, Kristie L. Ebi, Marie S. O'Neill, and G. Brooke Anderson

| <b>Table of Contents</b>                                                                                                                                                          | <b>Page</b> |
|-----------------------------------------------------------------------------------------------------------------------------------------------------------------------------------|-------------|
| <b>Table S1.</b> National and state surveys of adaptation to climate change                                                                                                       | <b>2</b>    |
| <b>Table S2.</b> Expanded version of Table 1. Summaries of county-level preparedness and response to the extreme heat of 2011 in states experiencing record-breaking heat in 2011 | <b>3</b>    |
| <b>Figure S1.</b> Map of states surveyed and the number of counties that responded to survey are shown in each of the survey states                                               | <b>6</b>    |
| <b>References</b>                                                                                                                                                                 | <b>7</b>    |

**Table S1.** National and state surveys of adaptation to climate change.

| <b>Study Affiliations</b>                                                                                                                        | <b>Survey Recipients/Region</b>                                                                   | <b>Method</b>                    | <b># of respondents</b> | <b>Time frame</b>              | <b>Response Rate (%)</b> |
|--------------------------------------------------------------------------------------------------------------------------------------------------|---------------------------------------------------------------------------------------------------|----------------------------------|-------------------------|--------------------------------|--------------------------|
| Public Policy Institute California (Bedsworth, 2009)                                                                                             | 61 Local public health officers throughout the state of California                                | web based                        | 34                      | August to October, 2007        | 56.0%                    |
| ICLEI - Local Governments for Sustainability, University of Michigan, Harvard University (O'Neill et. al, 2010)                                  | 284 US cities and ICLEI local government contacts in the environmental, public works, departments | Phase 1, Phase 2, online & paper | 70                      | July 2007 to January 2008      | 25.0%                    |
| Environmental Defense Fund - George Mason University - National Association of City and County Health Officials (NACCHO) - (Balbus et. al, 2008) | 217 local health departments were randomly selected out of 2,296 NACCHO members across the US     | telephone based                  | 133                     | November 2007 to February 2008 | 61.3%                    |
| The Oregon Coalition of Local Health Officers (CLHO) and University of Oregon's Climate Leadership Initiative (CLI) - (Vynne & Doppelt, 2009)    | 84 local health departments throughout the state of Oregon                                        | web based                        | 35                      | December 2008                  | 42.0%                    |
| Columbia University (Carr et. al, 2012)                                                                                                          | New York State city and county LHD officials, 1 respondent per LHD                                | web based                        | 22                      | November to December 2009      | 39.0%                    |

**Table S2.** Expanded version of Table 1. Summaries of county-level preparedness and response to the extreme heat of 2011 in states experiencing record-breaking heat in 2011. Each row gives both the percent of counties responding “Yes” of all counties with non-missing responses for the factor as well as the absolute number of counties responding “Yes” and responding with any non-missing answer. (Note: this table extends over several pages.)

|                                                  | <b>Percent of responding counties that responded “Yes”</b> | <b>Number of counties responding “Yes” / Number of counties responding</b> |
|--------------------------------------------------|------------------------------------------------------------|----------------------------------------------------------------------------|
| <b><u>Preparedness for heat in 2011</u></b>      |                                                            |                                                                            |
| <b>(1) Existing heat plan in 2011</b>            | <b>40%</b>                                                 | <b>76 / 188</b>                                                            |
| <i>How long plan has existed</i>                 |                                                            |                                                                            |
| < 1 year                                         | 12%                                                        | 9 / 72                                                                     |
| 1-3 years                                        | 33%                                                        | 24 / 72                                                                    |
| 4-6 years                                        | 36%                                                        | 26 / 72                                                                    |
| 7-9 years                                        | 6%                                                         | 4 / 72                                                                     |
| ≥10 years                                        | 12%                                                        | 9 / 72                                                                     |
| <i>When plan was last updated</i>                |                                                            |                                                                            |
| Within the last 6 months                         | 21%                                                        | 15 / 71                                                                    |
| Within the last year                             | 52%                                                        | 37 / 71                                                                    |
| Over a year ago                                  | 27%                                                        | 19 / 71                                                                    |
| <b>(2) Existing heat wave definition in 2011</b> | <b>30%</b>                                                 | <b>56 / 185</b>                                                            |
| <i>Basis for definition</i>                      |                                                            |                                                                            |
| National Weather Service or NOAA definition      | 28%                                                        | 15 / 54                                                                    |
| State-wide definition                            | 7%                                                         | 4 / 54                                                                     |
| City-specific heat health watch system           | 4%                                                         | 2 / 54                                                                     |
| <b><u>Response to heat in 2011</u></b>           |                                                            |                                                                            |
| <b>(1) Communicated about heat risks</b>         | <b>73%</b>                                                 | <b>132 / 180</b>                                                           |
| <i>Method of communication</i>                   |                                                            |                                                                            |
| Public service announcement                      | 53%                                                        | 95 / 180                                                                   |
| Websites                                         | 48%                                                        | 87 / 180                                                                   |
| Social media (e.g., Twitter, Facebook)           | 30%                                                        | 54 / 180                                                                   |
| Flyer / poster                                   | 18%                                                        | 32 / 180                                                                   |
| Emails                                           | 17%                                                        | 30 / 180                                                                   |
| Joint event with another group                   | 8%                                                         | 15 / 180                                                                   |
| Telephone hotline                                | 6%                                                         | 11 / 180                                                                   |

|                                                            | <b>Percent of responding counties that responded “Yes”</b> | <b>Number of counties responding “Yes” / Number of counties responding</b> |
|------------------------------------------------------------|------------------------------------------------------------|----------------------------------------------------------------------------|
| Door-to-door campaign                                      | 4%                                                         | 8 / 180                                                                    |
| Telephone call                                             | 1%                                                         | 2 / 180                                                                    |
| Other                                                      | 23%                                                        | 41 / 180                                                                   |
| <i>When communication about heat began</i>                 |                                                            |                                                                            |
| Before the summer season or extreme heat started           | 28%                                                        | 36 / 127                                                                   |
| During the summer after the extreme heat started           | 72%                                                        | 91 / 127                                                                   |
| <b>(2) Provided outreach / education on heat to public</b> | <b>64%</b>                                                 | <b>113 / 177</b>                                                           |
| <i>People to whom county provided outreach / education</i> |                                                            |                                                                            |
| People working with the elderly                            | 37%                                                        | 65 / 177                                                                   |
| People with certain medical conditions                     | 37%                                                        | 65 / 177                                                                   |
| People with low incomes                                    | 29%                                                        | 51 / 177                                                                   |
| Health care providers                                      | 25%                                                        | 45 / 177                                                                   |
| People who are mobility challenged                         | 15%                                                        | 27 / 177                                                                   |
| People working with the homeless                           | 12%                                                        | 22 / 177                                                                   |
| People living in high-rise apartment buildings             | 10%                                                        | 18 / 177                                                                   |
| People with nervous system disorders                       | 9%                                                         | 16 / 177                                                                   |
| Other                                                      | 30%                                                        | 52 / 177                                                                   |
| <b>(3) Collaborated with other organizations</b>           | <b>46%</b>                                                 | <b>66 / 145</b>                                                            |
| <i>Collaborations</i>                                      |                                                            |                                                                            |
| With medical professionals                                 | 36%                                                        | 52 / 146                                                                   |
| With social / civic organizations                          | 28%                                                        | 43 / 151                                                                   |
| With fire department                                       | 25%                                                        | 39 / 153                                                                   |
| With police department                                     | 23%                                                        | 35 / 154                                                                   |
| <b>(4) Opened cooling centers</b>                          | <b>40%</b>                                                 | <b>61 / 152</b>                                                            |
| <i>Number of cooling centers opened</i>                    |                                                            |                                                                            |
| 1-5 centers                                                | 83%                                                        | 49 / 59                                                                    |
| 6-10 centers                                               | 5%                                                         | 3 / 59                                                                     |
| >10 centers                                                | 12%                                                        | 7 / 59                                                                     |
| <i>Number of days cooling centers were open</i>            |                                                            |                                                                            |
| 1-5 days                                                   | 58%                                                        | 32 / 55                                                                    |
| 6-10 days                                                  | 18%                                                        | 10 / 55                                                                    |
| >10 days                                                   | 18%                                                        | 10 / 55                                                                    |
| All summer                                                 | 5%                                                         | 3 / 55                                                                     |

|                                                               | <b>Percent of responding counties that responded “Yes”</b> | <b>Number of counties responding “Yes” / Number of counties responding</b> |
|---------------------------------------------------------------|------------------------------------------------------------|----------------------------------------------------------------------------|
| <b>(5) Activated heat plan</b>                                | <b>24%</b>                                                 | <b>46 / 188</b>                                                            |
| <i>Number of days heat plan was activated</i>                 |                                                            |                                                                            |
| 1-5 days                                                      | 47%                                                        | 21 / 45                                                                    |
| 6-10 days                                                     | 24%                                                        | 11 / 45                                                                    |
| 11-20 days                                                    | 13%                                                        | 6 / 45                                                                     |
| >20 days but not the entire summer                            | 13%                                                        | 6 / 45                                                                     |
| Entire summer                                                 | 2%                                                         | 1 / 45                                                                     |
| <i>Prompt for activating heat plan</i>                        |                                                            |                                                                            |
| Internal decision                                             | 46%                                                        | 21 / 46                                                                    |
| Pre-defined trigger in heat wave early warning system         | 41%                                                        | 19 / 46                                                                    |
| Suggestion of emergency preparedness team                     | 30%                                                        | 14 / 46                                                                    |
| Directive or suggestion from state health department          | 28%                                                        | 13 / 46                                                                    |
| Noticeable spike in heat-related sickness and deaths          | 22%                                                        | 10 / 46                                                                    |
| Other                                                         | 15%                                                        | 7 / 46                                                                     |
| <b>(6) Assisted with relocation during electrical outages</b> | <b>4%</b>                                                  | <b>7 / 177</b>                                                             |
| <b>(7) Provided financial assistance</b>                      | <b>3%</b>                                                  | <b>7 / 177</b>                                                             |
| <i>Type of financial assistance</i>                           |                                                            |                                                                            |
| Help paying utility bills                                     | 3%                                                         | 5 / 177                                                                    |
| Help buying food or bottled water                             | 1%                                                         | 1 / 177                                                                    |
| Help purchasing a fan or air conditioner                      | 1%                                                         | 1 / 177                                                                    |
| Other                                                         | 0%                                                         | 0 / 177                                                                    |
| <b>(8) Provided transportation</b>                            | <b>2%</b>                                                  | <b>4 / 179</b>                                                             |
| <i>People to whom county provided transportation</i>          |                                                            |                                                                            |
| People who called and requested transportation                | 2%                                                         | 3 / 179                                                                    |
| Residents of an apartment / specific neighborhood             | 1%                                                         | 1 / 179                                                                    |
| Elderly                                                       | 0%                                                         | 0 / 179                                                                    |
| Homeless                                                      | 0%                                                         | 0 / 179                                                                    |
| Children                                                      | 0%                                                         | 0 / 179                                                                    |
| Other                                                         | 0%                                                         | 0 / 179                                                                    |
| <b>(9) Hired new staff in response to heat</b>                | <b>1%</b>                                                  | <b>1 / 167</b>                                                             |

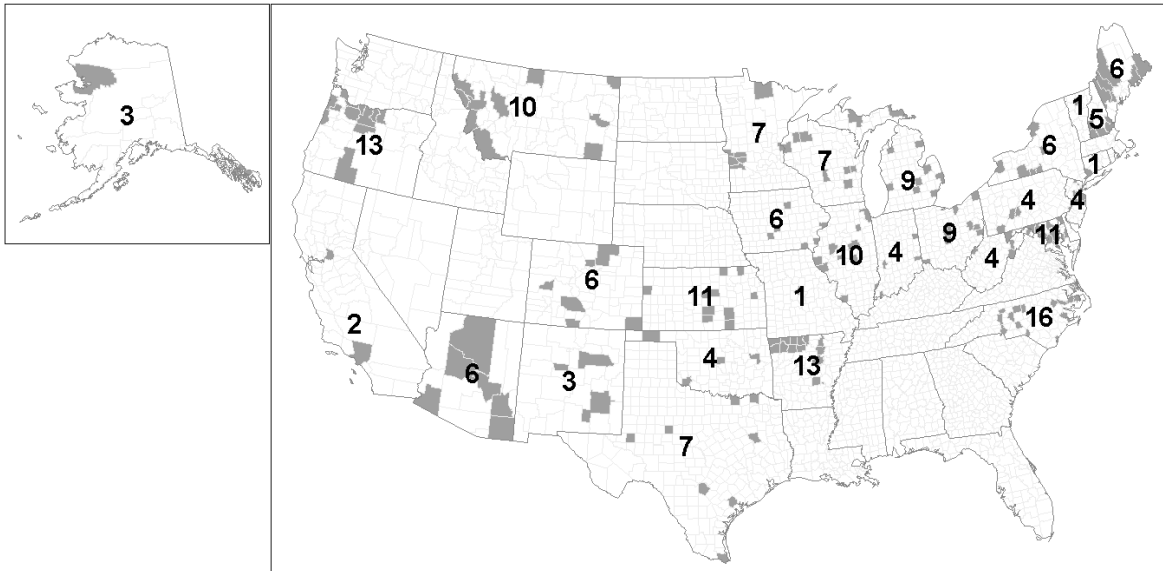

**Figure S1.** Map of states surveyed and the number of counties that responded to survey are shown in each of the survey states.

## References

- Bedsworth L. 2009. Preparing for climate change: A perspective from local public health officers in California. *Environ Health Perspect* 117(4):617-623.
- O'Neill MS, Jackman DK, Wyman M, Manarolla X, Gronlund CJ, Brown DG, et. al. 2010. US local action on heat and health: Are we prepared for climate change? *Int J Public Health* 55(2):105-112.
- Balbus J, Ebi K, Finzart, Malina C, Chadwick A, McBride D, et. al. 2008. Are we Ready? Preparing for the public health challenges of climate change. Available:<http://www.climatechangecommunication.org/images/files/NACCHO%20EDF%20GMU%20Survey%281%29.pdf> [Accessed 9 February 2014].
- Vynne S, Doppelt B. 2009. Available: <https://scholarsbank.uoregon.edu/xmlui/bitstream/handle/1794/10739/ORPHSurveyReportFinal.pdf?sequence=1> [Accessed 9 February 2014].
- Carr JL, Sheffield PE, Kinney PL. 2012. Preparedness for climate change among local health department officials in New York state: a comparison with national survey results. *J Public Health Manag Pract*. 18(2):E24-32.
